# Supplementary material for: NatD promotes lung cancer progression by preventing histone H4 serine phosphorylation to activate Slug expression
Source: PubMed Central journal article supplement (PMC5640650; doi:10.1038/s41467-017-00988-5), 2017-10-13
Supplement: 41467_2017_988_MOESM1_ESM.pdf [file 41467_2017_988_MOESM1_ESM.pdf]

### **Description of Supplementary Files**

File Name: Supplementary Information

Description: Supplementary Figures, Supplementary Tables and Supplementary Reference

File Name: Peer Review File

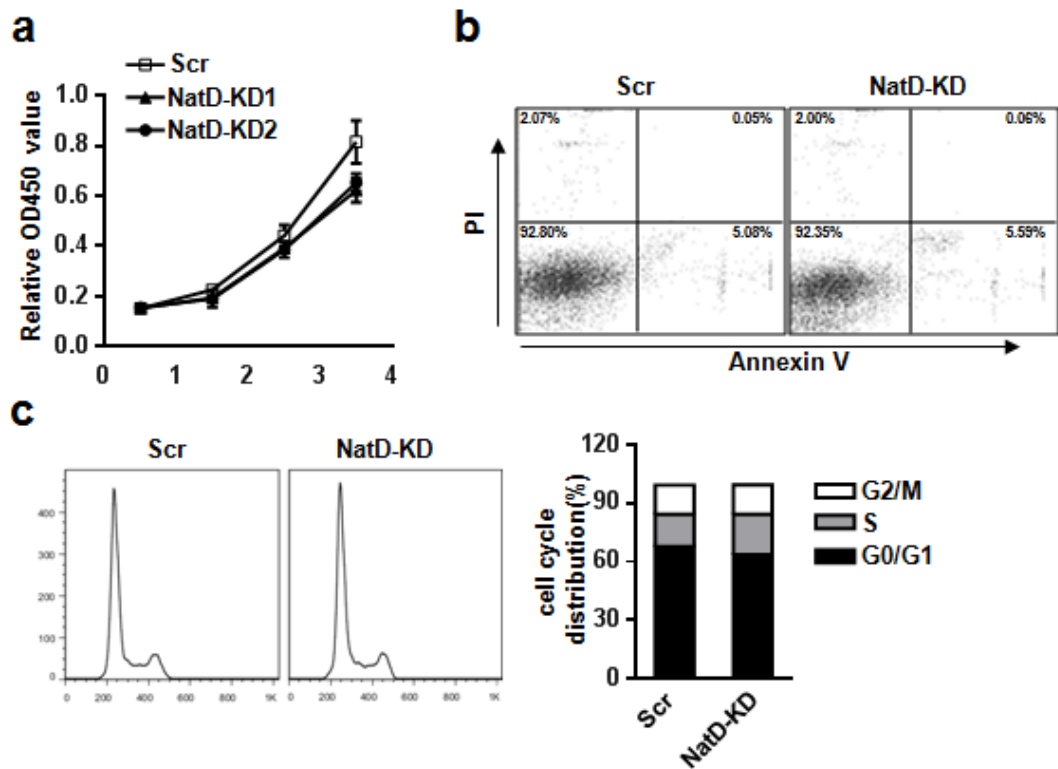

**Supplementary Figure 1. Knockdown of NatD has no effect on cell proliferation, apoptosis, or cell cycle in H1299 cells.** (a) Growth curve of Scr, NatD-KD1, and NatD-KD2 H1299 cells from three independent experiments. (b and c) Representative images from three independent experiments of apoptosis (b) and cell cycle analysis (c) of Scr and NatD-KD H1299 cells analyzed by flow cytometry.

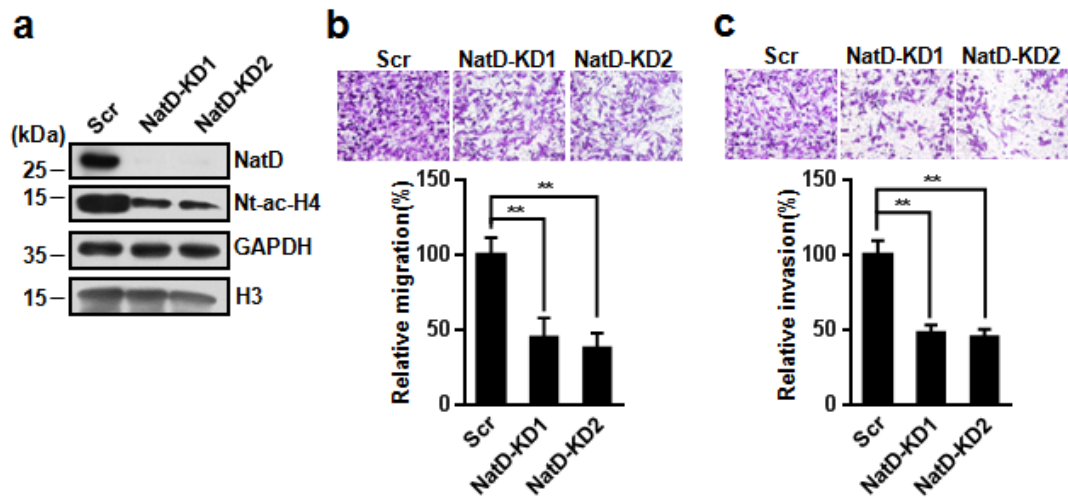

**Supplementary Figure 2. NatD knockdown inhibits cell migration and invasion**

**of A549 cells.** (a) Western blot analysis of NatD and Nt-ac-H4 in Scr, NatD-KD1 and

NatD-KD2 A549 cells. Blots are representative of three independent experiments. (b

and c) (top) Images ( $\times 100$  magnification) from transwell assay of migration (b) and

invasion (c) of Scr, NatD-KD1 and NatD-KD2 A549 cells representative of three

independent experiments. (bottom) Quantification of cell migration and invasion

expressed as a percentage of Scr control; mean  $\pm$  s.d. from three independent

experiments; two-tailed Student's *t*-test,  $**P < 0.01$  compared to Scr control.

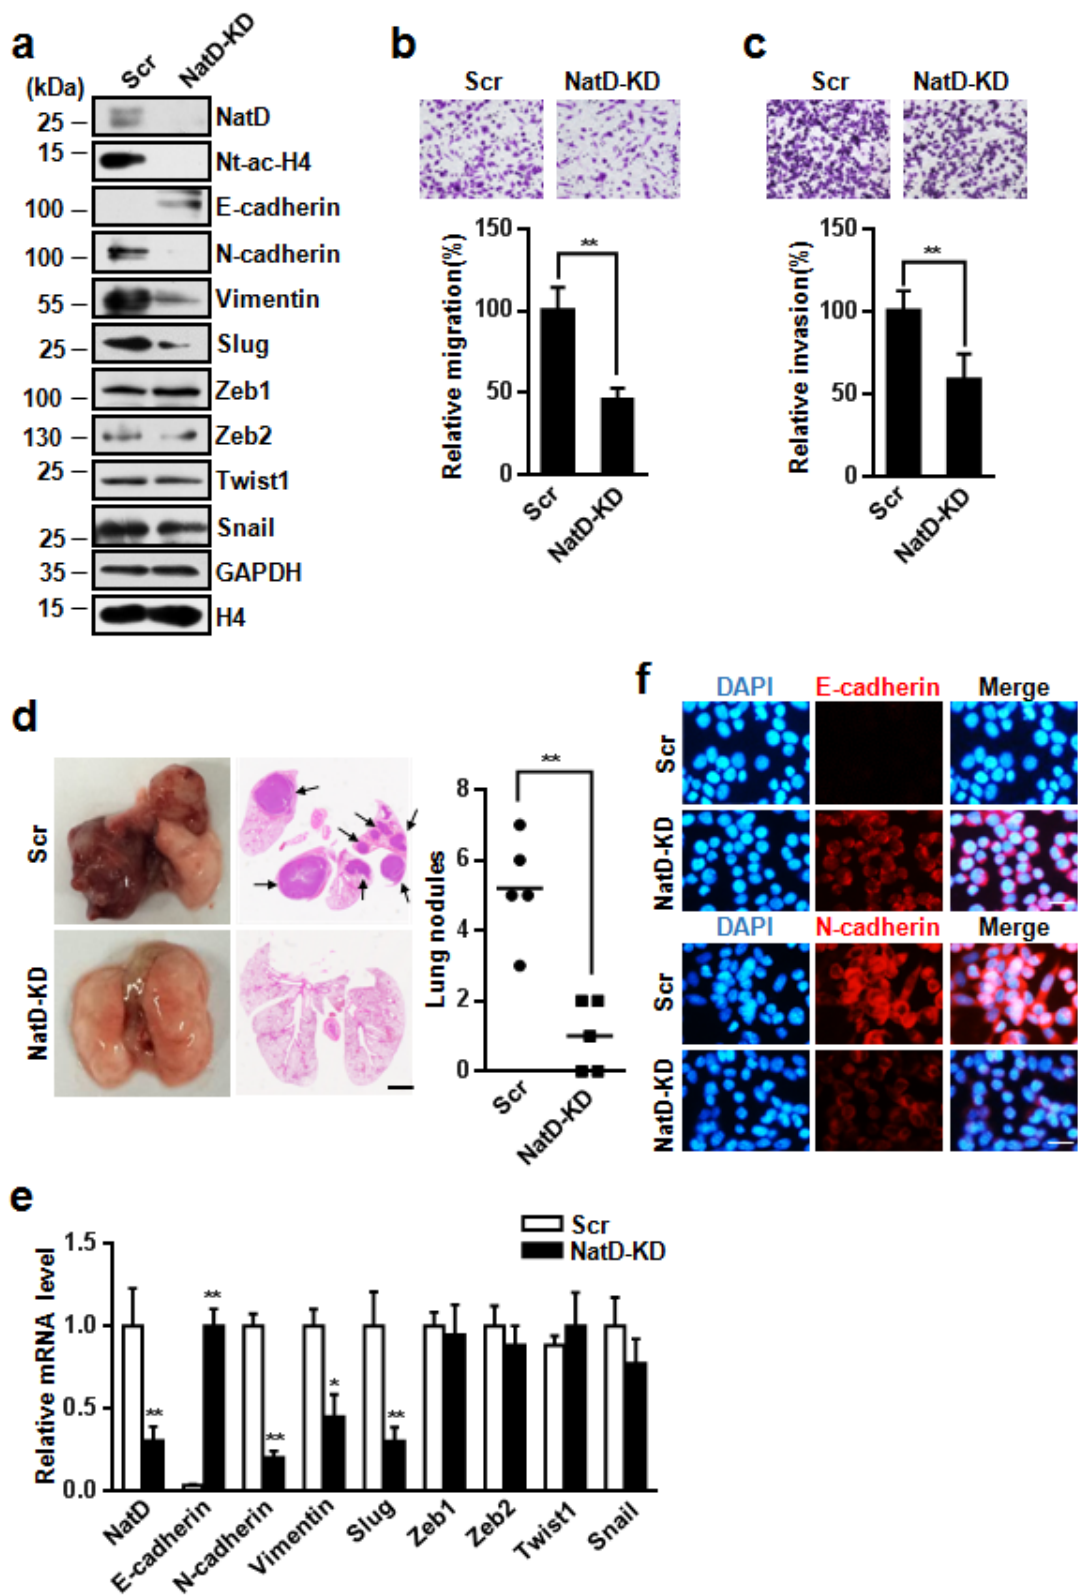

Supplementary Figure 3. NatD knockdown inhibits mouse LLC cell migration and invasion in vivo. (a) Western blot analysis of NatD, Nt-ac-H4, and key EMT-

related proteins in Scr control and NatD-KD murine Lewis lung carcinoma (LLC) cells. Human NatD shRNA KD2 targeting sequence (NatD-KD2) was used in mouse. Representative blots from three independent experiments. **(b and c)** (top) Representative images of transwell assay of the migration **(b)** and invasion **(c)** of Scr control and NatD-KD LLC cells. Images are representative of three independent experiments. (bottom) Cell migration and invasion expressed as a percentage of Scr control. Calculation based on cell counts for the corresponding assays of at least four random individual fields visualized at  $\times 100$  magnification. Results are shown as mean  $\pm$  s.d. from three independent experiments; two-tailed Student's *t*-test,  $**P < 0.01$  compared to Scr control. **(d)** (left) Representative images of lung nodules of C57BL/6 mice 30 days after intravenous injection of Scr or NatD-KD LLC cells. (middle) Representative histological images of H&E stained lung from corresponding mice. Scale bars, 2 mm. The arrows indicate major metastatic nodules. (right) Box plot showing numbers of lung nodules from corresponding mice;  $n = 5$  mice per group. Results are shown as mean  $\pm$  s.d. from 5 mice; two-tailed Student's *t*-test,  $**P < 0.01$  compared to Scr control. **(e)** Quantitative real-time PCR analysis of mRNA levels of NatD and key EMT-related genes in Scr control and NatD-KD LLC cells normalized to GAPDH. Results are shown as mean  $\pm$  s.d. from three independent experiments; two-tailed Student's *t*-test,  $*P < 0.05$ ,  $**P < 0.01$  compared to Scr control. **(f)**

Immunofluorescence analysis of Scr and NatD-KD LLC cells stained for E-cadherin and N-cadherin. Data are representative of three independent experiments. Scale bar, 20  $\mu\text{m}$ .

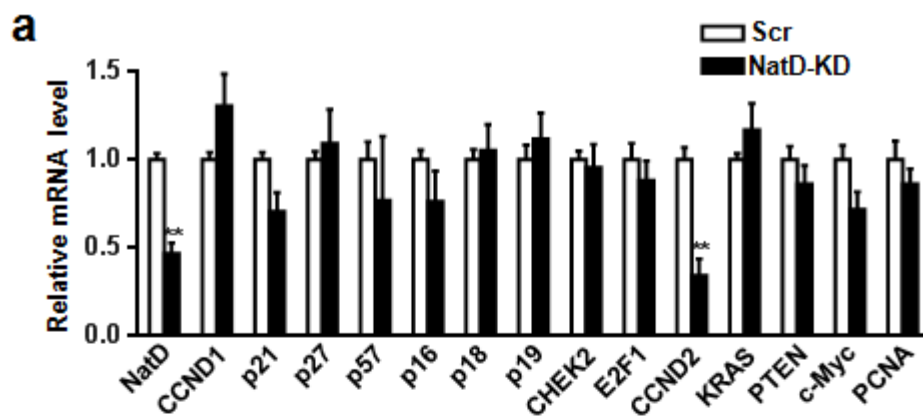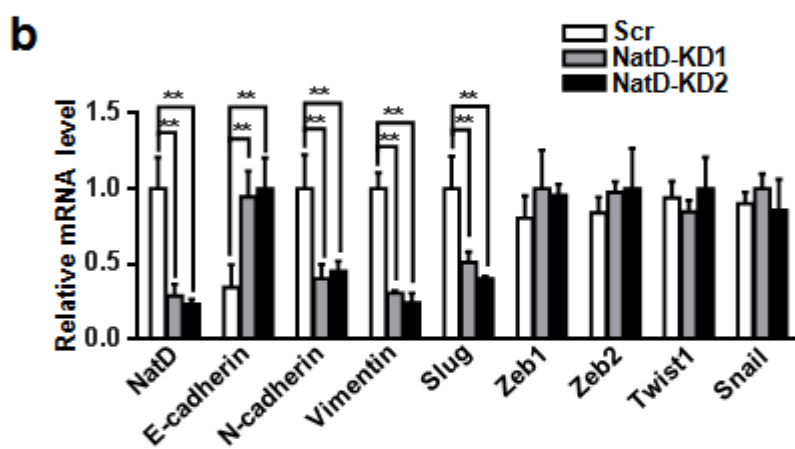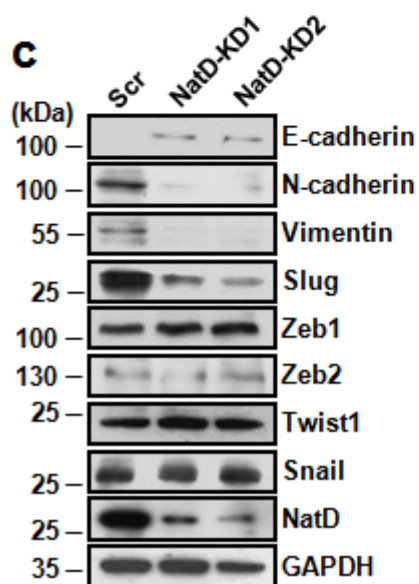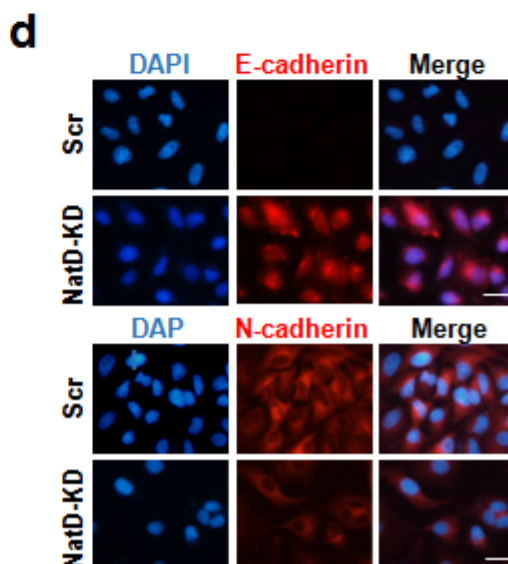

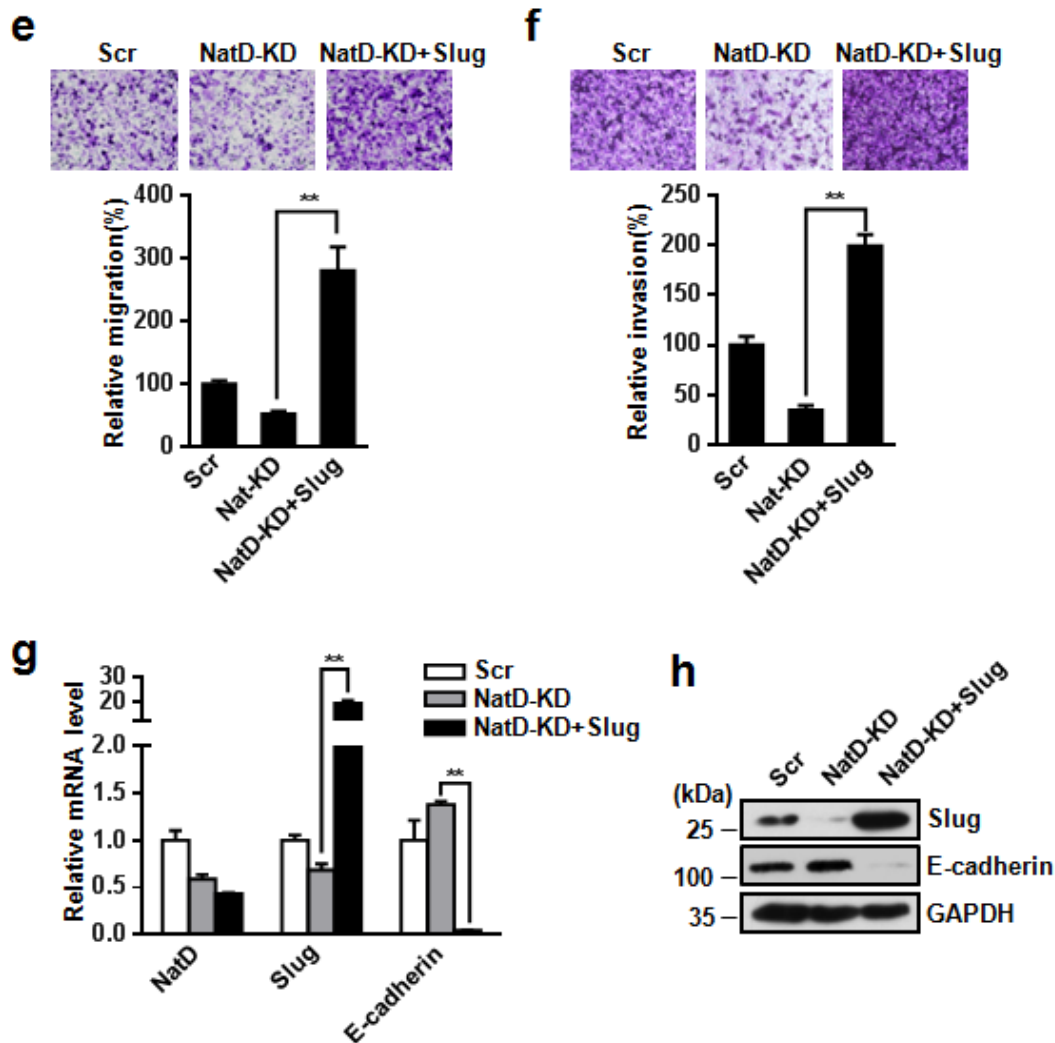

**Supplementary Figure 4. NatD knockdown suppresses cell migration and invasion by downregulating Slug in A549 cells.** (a) Quantitative real-time PCR analysis of mRNA levels of NatD, CCND1, p21, p27, p57, p16, p18, p19, CHEK2, E2F1, CCND2, KRAS, PTEN, c-Myc, and PCNA in scrambled (Scr) and NatD knockdown (NatD-KD) H1299 cells normalized to GAPDH. Results are shown as mean  $\pm$  s.d. of three independent experiments; two-tailed Student's *t*-test,  $**P < 0.01$  compared to Scr control. (b) Quantitative real-time PCR analysis of mRNA levels of NatD and key EMT-related genes in Scr and NatD-KD A549 cells normalized to



GAPDH. Results are shown as mean  $\pm$  s.d. of three independent experiments; two-tailed Student's *t*-test,  $**P<0.01$  compared to Scr control. **(c)** Western blot analysis of expression of NatD and key EMT-related proteins in Scr and NatD-KD A549 cells. GAPDH served as a loading control. Blots are representative of three independent experiments. **(d)** Immunofluorescence analysis of Scr and NatD-KD A549 cells stained for E-cadherin and N-cadherin. Data are representative of three independent experiments. Scale bar, 20  $\mu$ m. **(e and f)** (top) Representative images of transwell assay of migration **(e)** and invasion **(f)** of scrambled (Scr), NatD knockdown (NatD-KD) and Slug-expressing NatD-KD (NatD-KD+Slug) A549 cells from three independent experiments. (bottom) Cell migration and invasion expressed as a percentage of control. Calculations based on cell counts from the corresponding assays of at least four random fields at  $\times 100$  magnification from three independent experiments. Results are shown as mean  $\pm$  s.d. of three independent experiments; two-tailed Student's *t*-test,  $**P<0.01$  compared to indicated control. **(g)** Quantitative real-time PCR analysis of the mRNA levels of NatD, Slug, and E-cadherin normalized to GAPDH in Scr, NatD-KD, and Slug-expressing NatD-KD A549 cells. Results are shown as mean  $\pm$  s.d. of three independent experiments; two-tailed Student's *t*-test,  $**P<0.01$  compared to indicated control. **(h)** Western blot analysis of Slug and E-cadherin in scrambled, NatD-KD, and Slug-expressing NatD-KD A549 cells.

GAPDH served as a loading control. Blots are representative of three independent experiments.

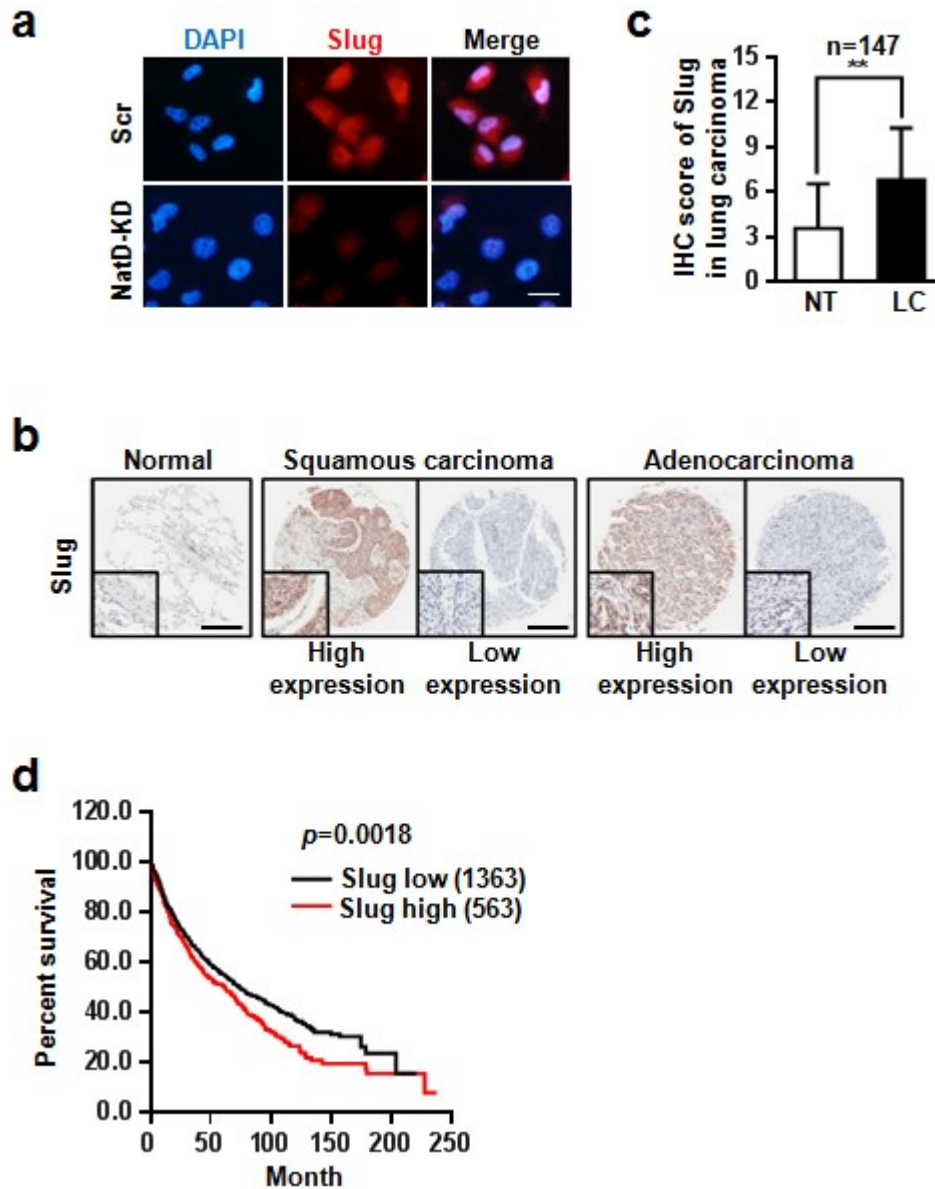

**Supplementary Figure 5. Slug expression in human lung cancer tissues. (a)**

Immunofluorescence analysis of Scr and NatD-KD H1299 cells stained for Slug. Data

are representative of three independent experiments. Scale bar, 20  $\mu$ m. **(b)**

Representative images of immunohistochemical (IHC) staining of Slug in normal

tissues (n=147), human lung squamous carcinoma (n=74), and lung adenocarcinoma

(n=73) tissue samples. Scale bars, 500  $\mu$ m. **(c)** Total IHC score of Slug in matched

normal tissues (NT) and lung carcinoma (LC); mean  $\pm$  s.d. of 147 pairs of tissue samples. two-tailed Student's *t*-test, \*\* $P < 0.01$  compared to matched normal tissue control. (d) Kaplan–Meier plots of overall survival of patients with lung cancer, stratified by Slug expression. Data were obtained from Kaplan-Meier plotter database; log-rank test,  $P = 0.0018$ .

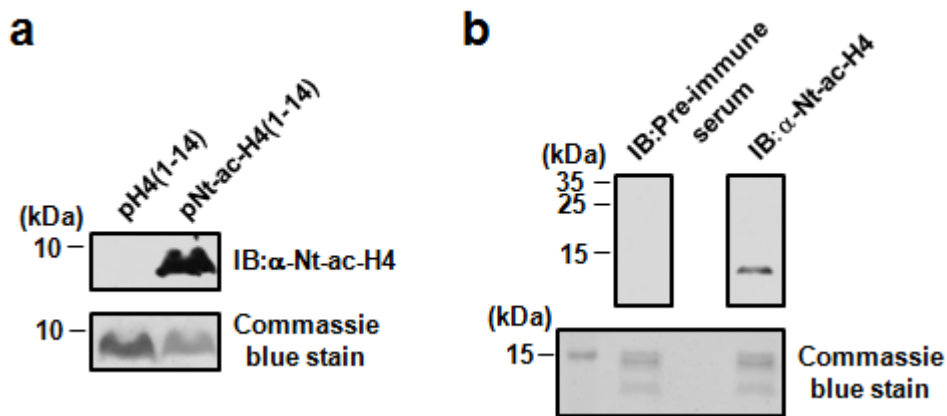

**Supplementary Figure 6. Validation of anti-Nt-ac-H4 antibody.** (a) Western blot analysis of acetylated (pNt-ac-H4) or non-acetylated (pH4) peptides with anti-Nt-ac-H4 antibody. (b) (top) Western blot analysis of histones from H1299 cells with pre-immune serum or with anti-Nt-ac-H4 antibody. Coomassie blue staining of histones isolated from H1299 cells (bottom panel). Blots in (a) and (b) are representative of three independent experiments.

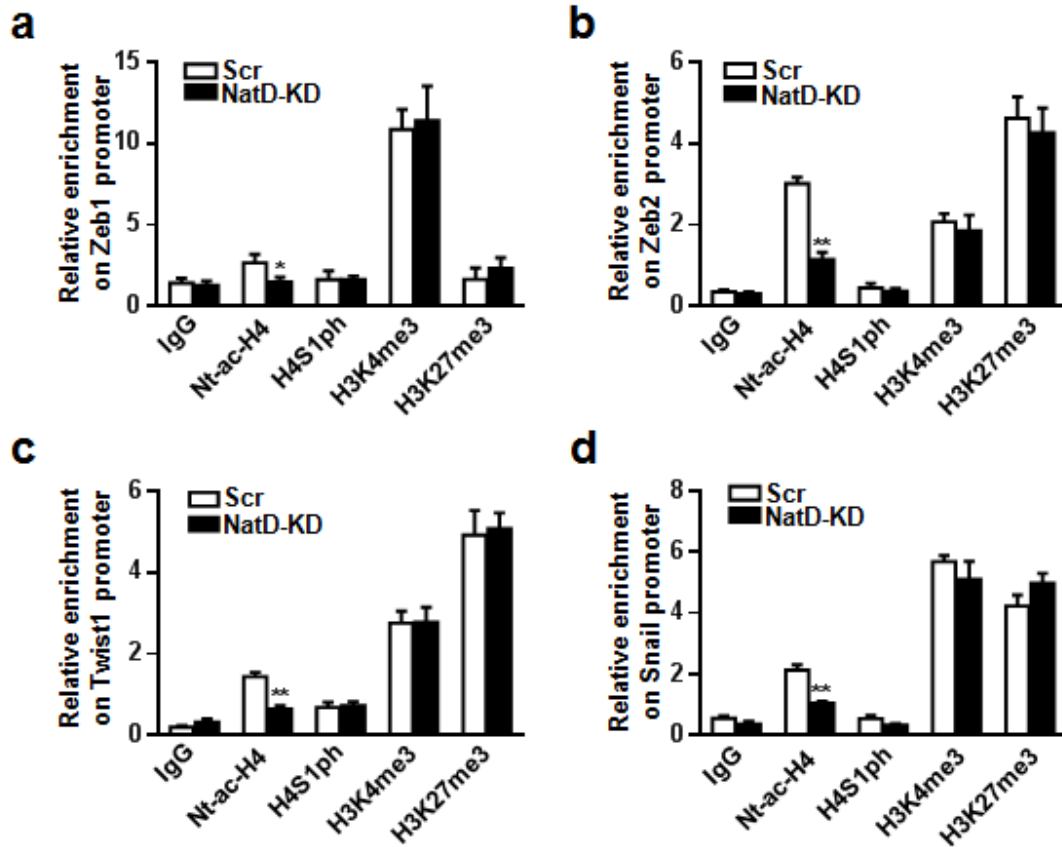

**Supplementary Figure 7. Knockdown of NatD has no effect on enrichment of H4S1ph on some EMT-related gene promoters.** (a-d) ChIP analysis of the enrichment of Nt-ac-H4, H4S1ph, H3K4me3 and H3K27me3 on the promoter of Zeb1(a), Zeb2(b), Twist1(c), and Snail (d) in Scr and NatD-KD H1299 cells. IgG served as a negative control. Results are shown as mean  $\pm$  s.d. of three independent experiments; two-tailed Student's *t*-test, \*\* $P < 0.01$  or \* $P < 0.05$  compared to Scr control.

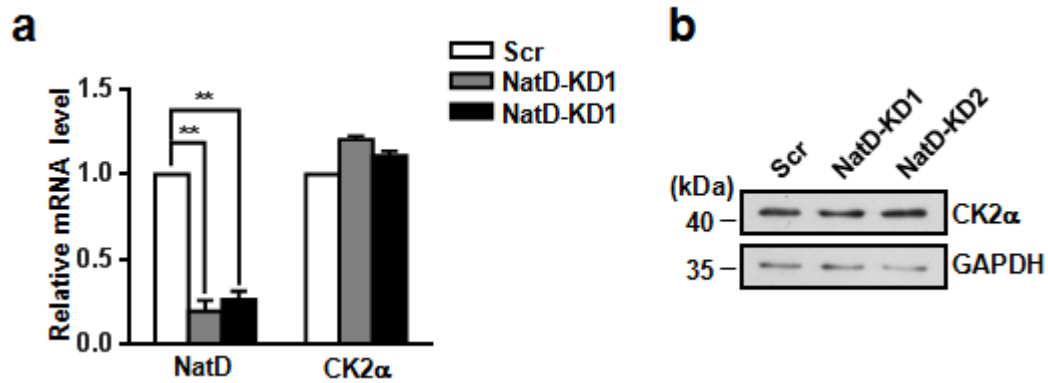

**Supplementary Figure 8. Knockdown of NatD has no effect on expression of**

**CK2 $\alpha$ .** (a) Quantitative real-time PCR analysis of NatD and CK2 $\alpha$  mRNA levels in scrambled and NatD-KD H1299 cells normalized to GAPDH. Results are shown as mean  $\pm$  s.d. of three independent experiments; two-tailed Student's *t*-test,  $**P < 0.01$  compared to Scr control. (b) Western blot analysis of CK2 $\alpha$  protein in Scr and NatD-KD H1299 cells. GAPDH served as a loading control. Blots are representative of three independent experiments.

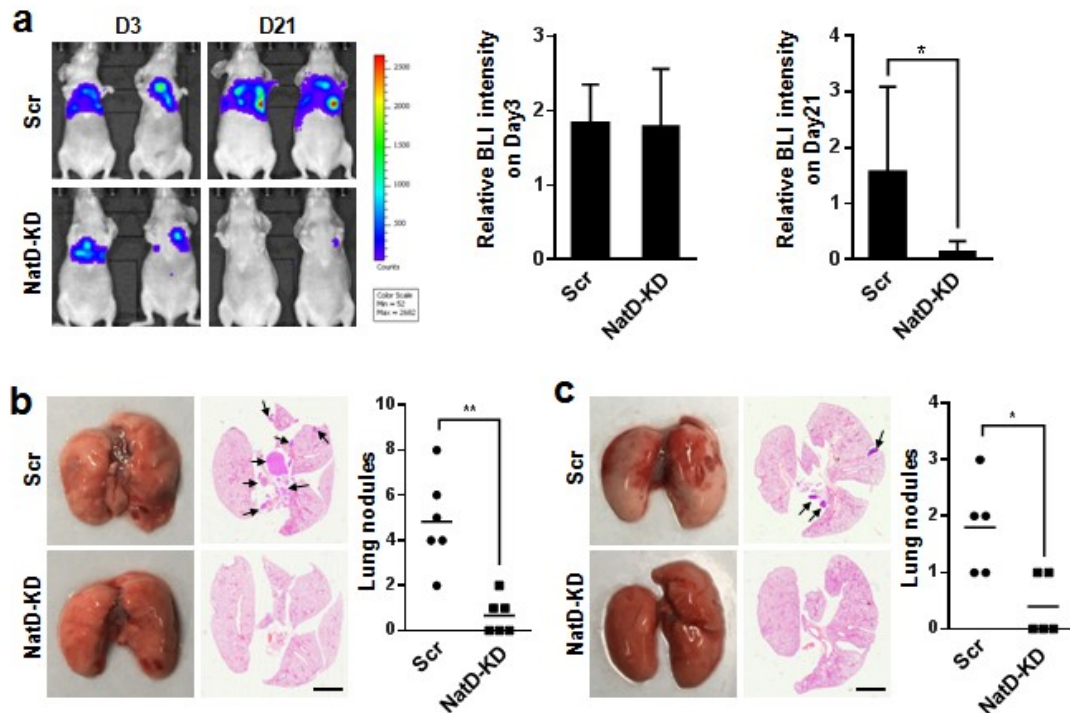

**Supplementary Figure 9. NatD knockdown inhibits the migration and invasion of human A549 cells and murine LLC cells in orthotopic lung tumor implantation models.** (a) (left) Representative bioluminescent (BLI) images acquired at the indicated time points after orthotopic injection with luciferase-labeled Scr or NatD-KD A549 cells in nude mice. Pseudocolor heat-maps indicate intensity of bioluminescence from low (blue) to high (red) (D, day). (right) Relative BLI signals of lung tumors of corresponding mice (n = 6 for each group) recorded on day 3 and day 21. Results are shown as mean  $\pm$  s.d. from 6 mice. Two-tailed Student's t-test was used. \* $P < 0.05$  compared to Scr control. (b) (left) Representative images of lung nodules in nude mice acquired 21 days after orthotopic injection with Scr or NatD-KD A549 cells. (middle) Representative images of H&E stained histological sections



of lungs from nude mice. Scale bars, 2 mm. Arrows indicate major lung nodules.

(right) Box plot showing numbers of lung nodules from corresponding mice ( $n = 6$  for each group). Results are shown as mean  $\pm$  s.d. from 6 mice. Two-tailed Student's  $t$ -test was used.  $*P < 0.05$  compared to Scr control. (c) (left) Representative images of lung nodules of C57BL/6 mice 14 days after orthotopic injection of Scr or NatD-KD LLC cells. (middle) Representative histological images of H&E stained lung from corresponding mice. Scale bars, 2 mm. The arrows indicate major metastatic nodules. (right) Box plot showing numbers of lung nodules from corresponding mice ( $n = 5$  mice per group).

Supplementary Figure 10. Original images of Western blot

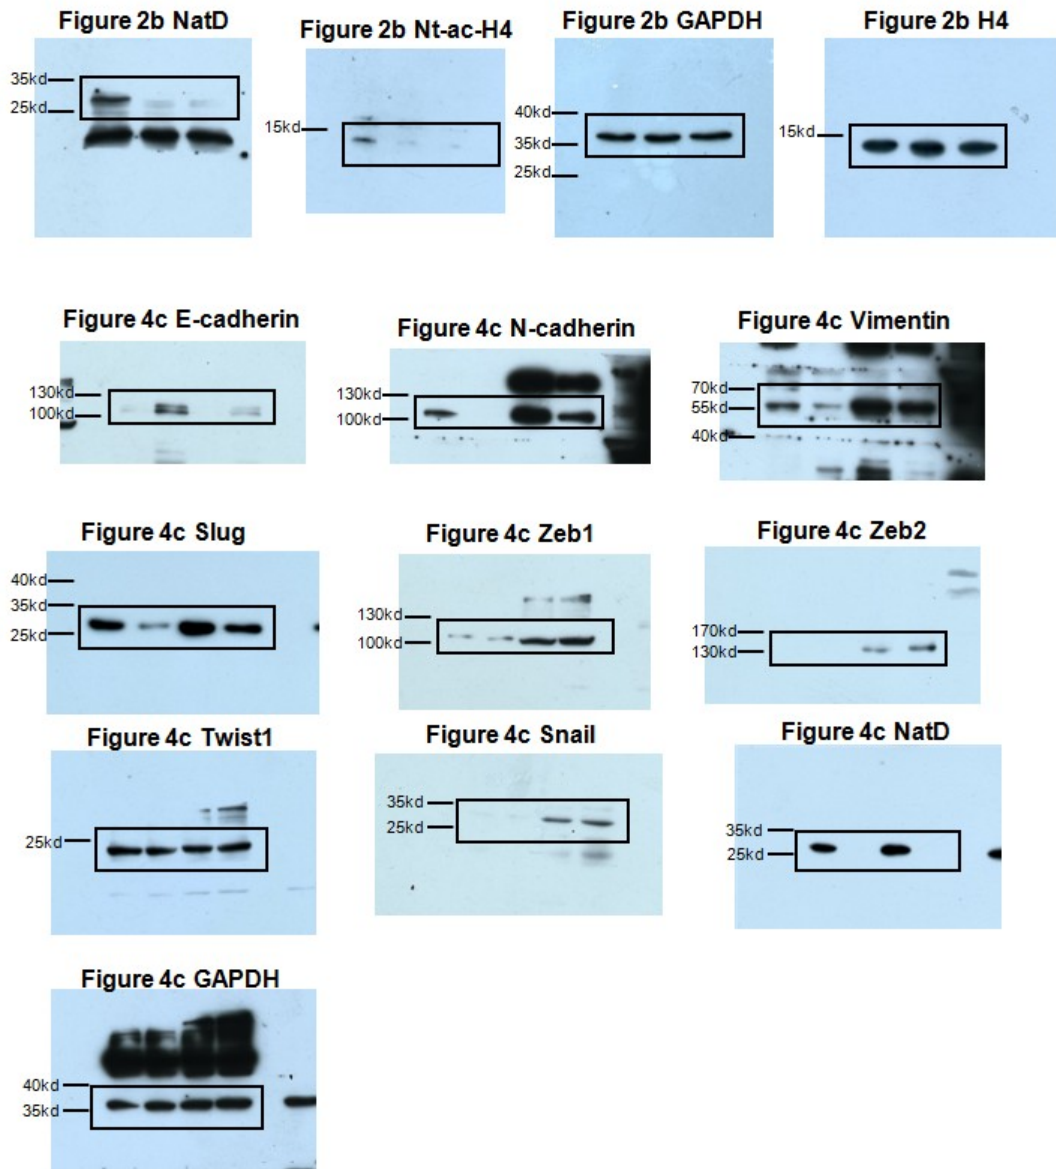

**Figure 4h Slug**

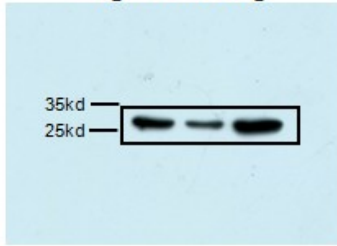

**Figure 4h E-cadherin**

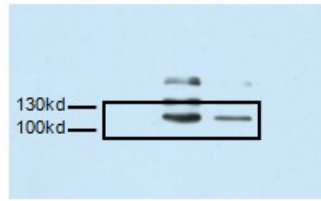

**Figure 4h N-cadherin**

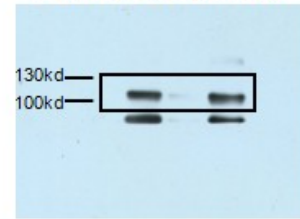

**Figure 4h Vimentin**

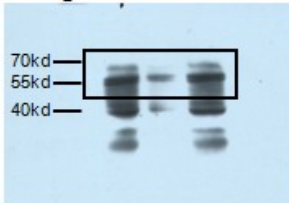

**Figure 4h Zeb1**

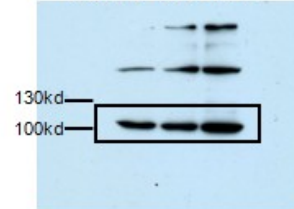

**Figure 4h Zeb2**

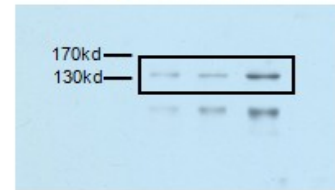

**Figure 4h Twist1**

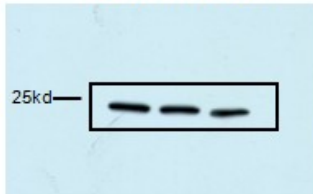

**Figure 4h Snail**

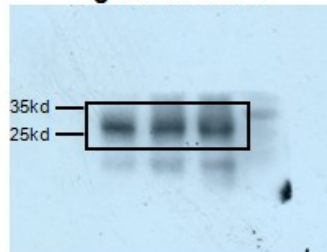

**Figure 4h GAPDH**

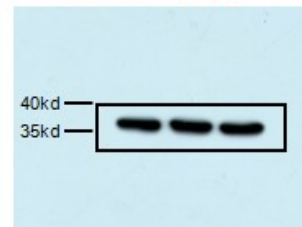

**Figure 5b Nt-ac-H4**

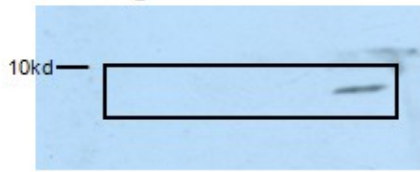

**Figure 5c autoradiography**

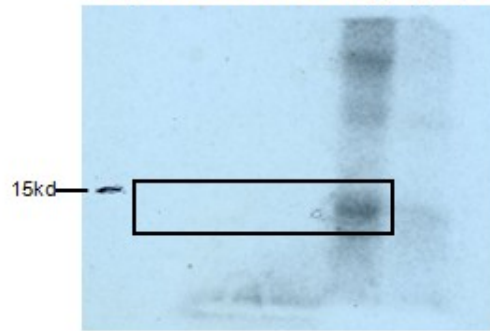

**Figure 5e Slug**

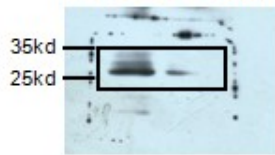

**Figure 5e E-cadherin**

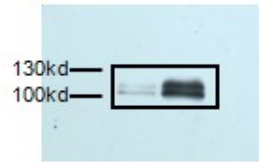

**Figure 5e N-cadherin**

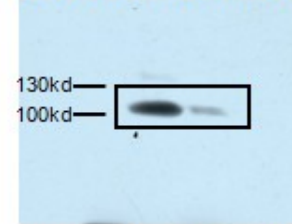

**Figure 5e Vimentin**

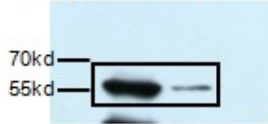

**Figure 5e NatD**

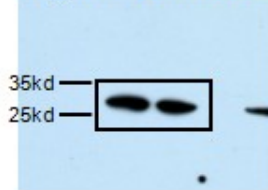

**Figure 5e Nt-ac-H4**

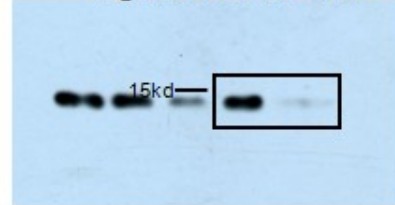

**Figure 5e GAPDH**

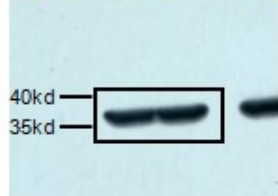

**Figure 5e H4**

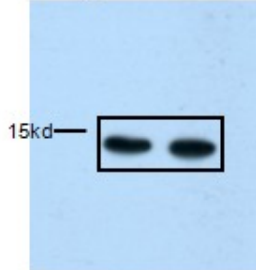

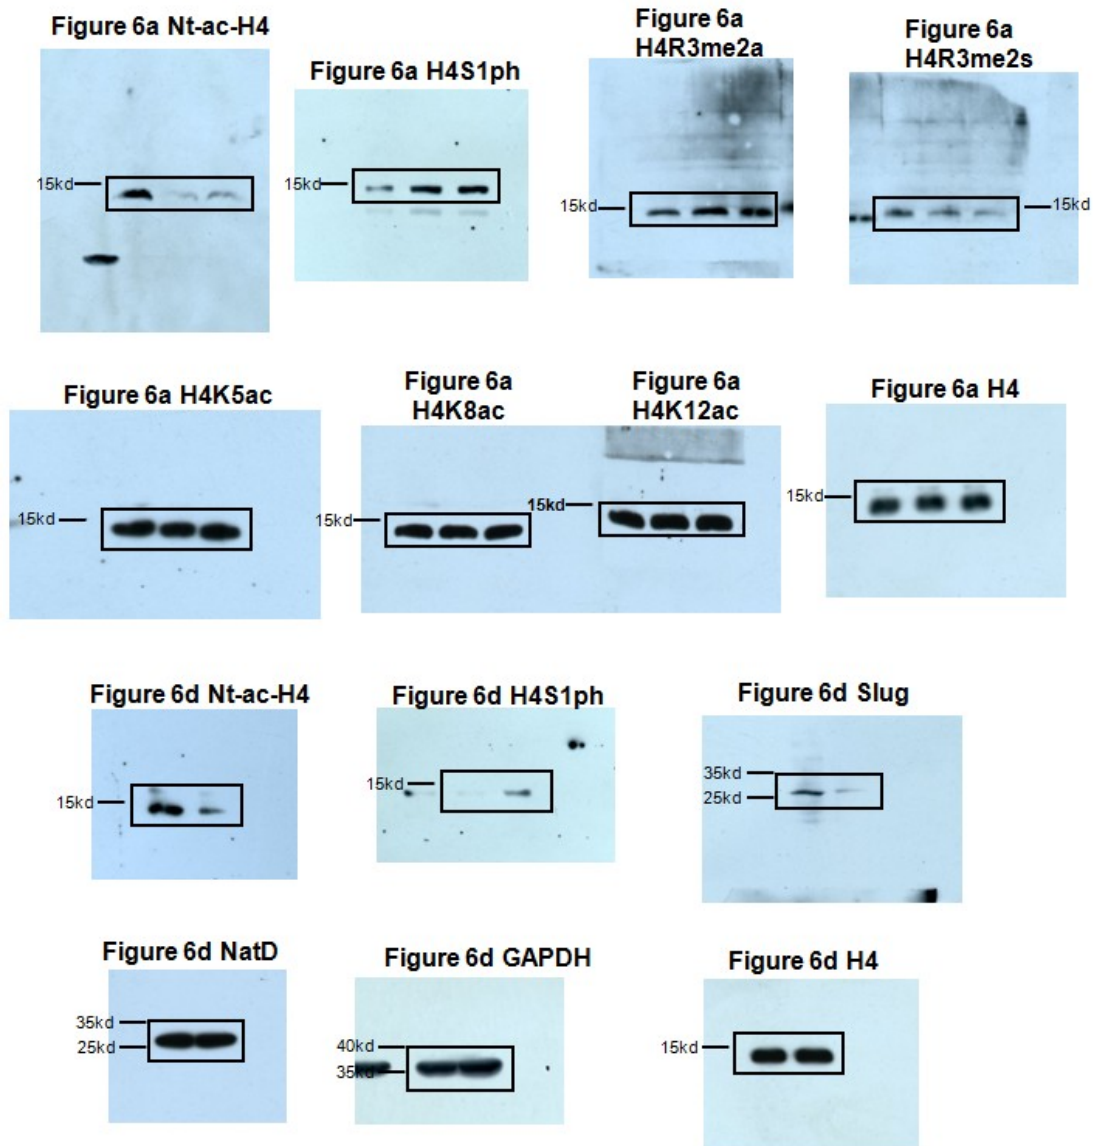

**Figure 7b CK2 $\alpha$**

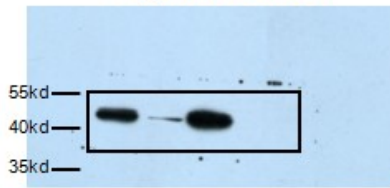

**Figure 7b Lamin A/C**

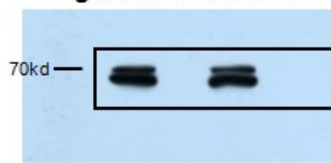

**Figure 7b HSP70**

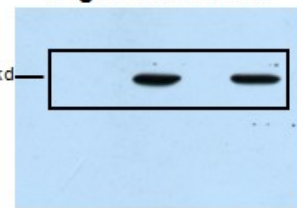

**Figure 7c CK2 $\alpha$**

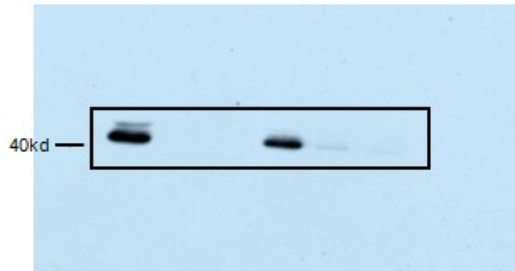

**Figure 7c Streptavidin**

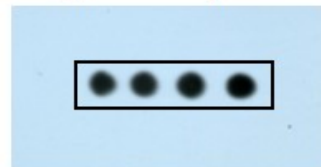

**Figure 7c Nt-ac-H4**

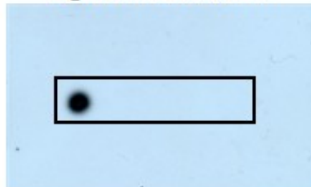

**Figure 7h Slug**

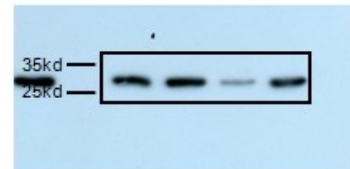

**Figure 7h CK2 $\alpha$**

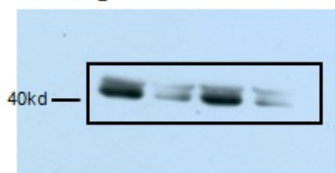

**Figure 7h GAPDH**

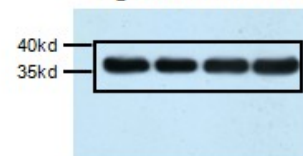

**Supplemental Figure 2a NatD**

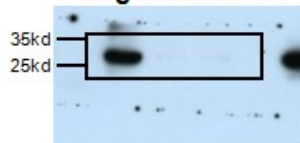

**Supplemental Figure 2a Nt-ac-H4**

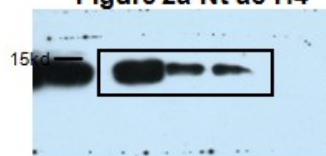

**Supplemental Figure 2a GAPDH**

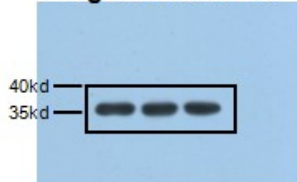

**Supplemental Figure 2a H3**

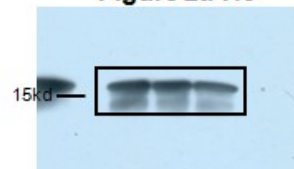



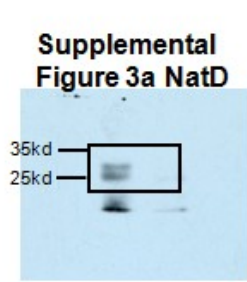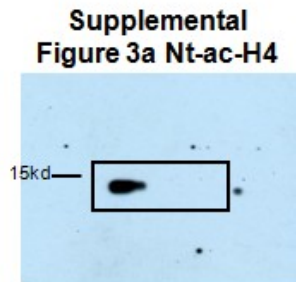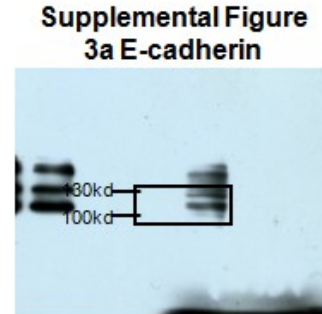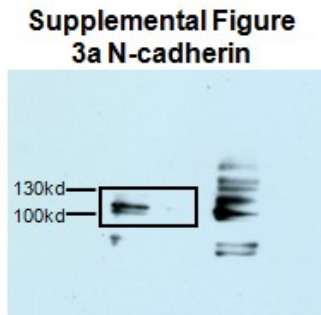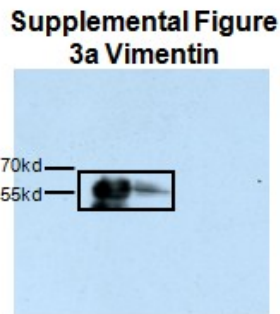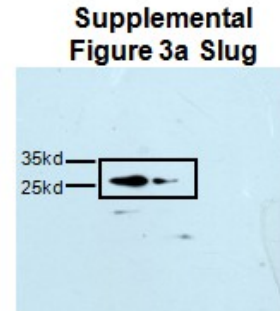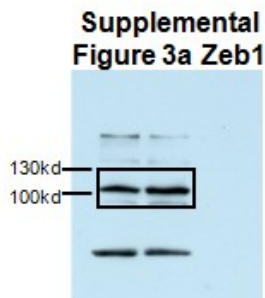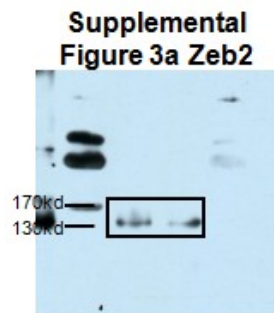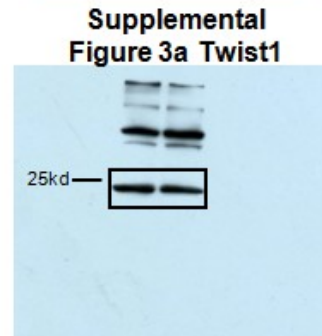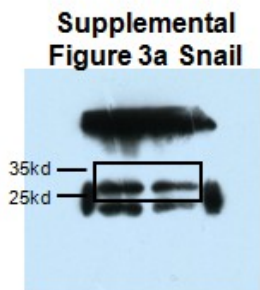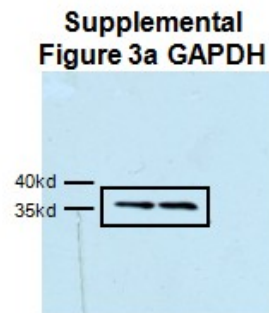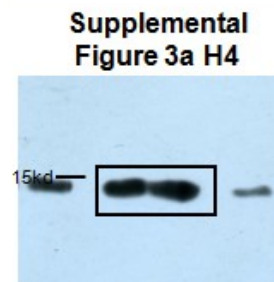

**Supplemental Figure 4c E-cadherin**

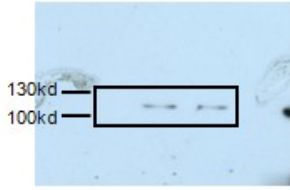

**Supplemental Figure 4c N-cadherin**

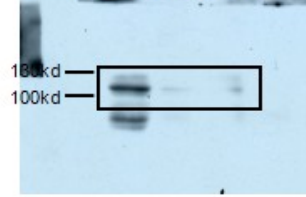

**Supplemental Figure 4c Vimentin**

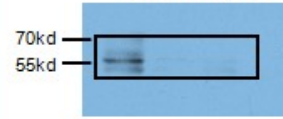

**Supplemental Figure 4c Slug**

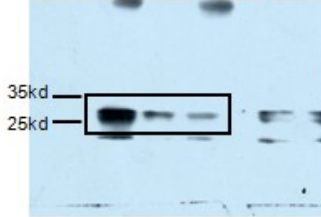

**Supplemental Figure 4c Zeb1**

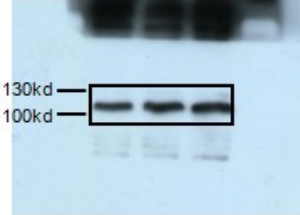

**Supplemental Figure 4c Zeb1**

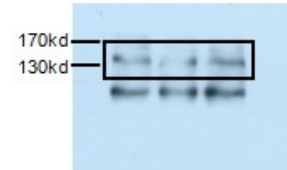

**Supplemental Figure 4c Twist1**

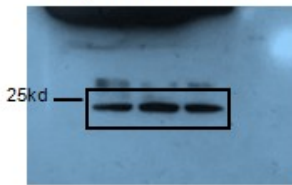

**Supplemental Figure 4c Snail**

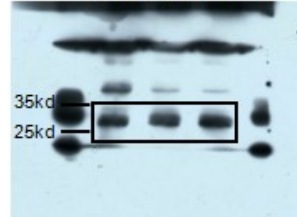

**Supplemental Figure 4c NatD**

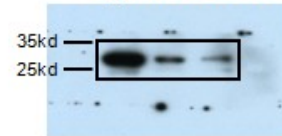

**Supplemental Figure 4c GAPDH**

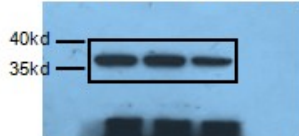



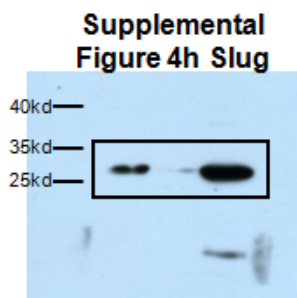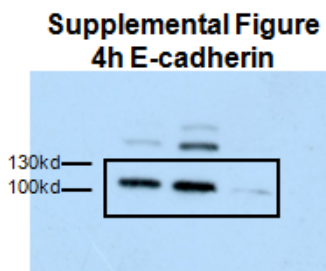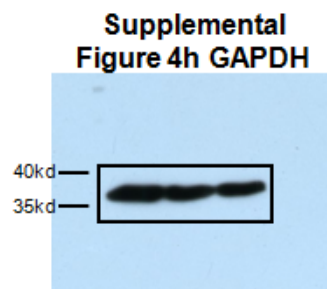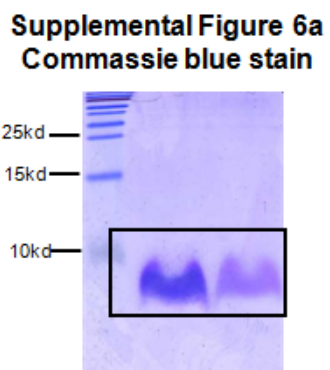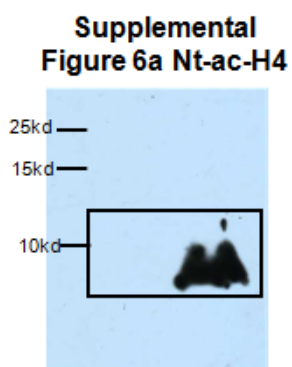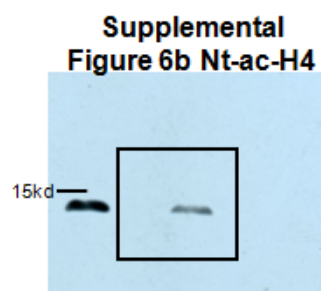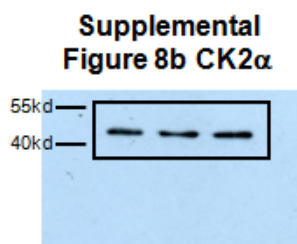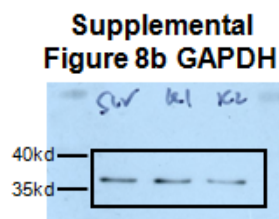

**Supplementary Table 1: Clinicopathologic characteristics of NatD expression in lung cancer patients**

| <b>Characteristics</b>                | <b>Cases</b> | <b>IHC score<br/>(Mean ± s.d.)</b> | <b>P value<sup>a</sup></b> |
|---------------------------------------|--------------|------------------------------------|----------------------------|
|                                       | 147          |                                    |                            |
| <i>Gender</i>                         |              |                                    | <i>0.1097</i>              |
| Male                                  | 109          | 7.303±3.604                        |                            |
| Female                                | 38           | 8.421±3.922                        |                            |
| <i>Age</i>                            |              |                                    | <i>0.3480</i>              |
| >60                                   | 81           | 7.852±3.818                        |                            |
| ≤60                                   | 66           | 7.273±3.571                        |                            |
| <i>Tumor size</i>                     |              |                                    | <i>0.0182</i>              |
| ≥5 cm                                 | 58           | 8.483±3.440                        |                            |
| <5 cm                                 | 89           | 7.011±3.780                        |                            |
| <i>Tumor stage<sup>b</sup></i>        |              |                                    | <i>0.6421</i>              |
| I-II                                  | 104          | 7.500±3.642                        |                            |
| III                                   | 43           | 7.814±3.899                        |                            |
| <i>Lymph node status<sup>b</sup></i>  |              |                                    | <i>0.0367</i>              |
| N0                                    | 82           | 7.024±3.641                        |                            |
| N1-3                                  | 65           | 8.308±3.695                        |                            |
| <i>Distant metastasis<sup>b</sup></i> |              |                                    | <i>0.7345</i>              |
| M0                                    | 138          | 7.565±3.733                        |                            |
| M1                                    | 9            | 8.000±3.465                        |                            |
| <i>Histology</i>                      |              |                                    | <i>0.1332</i>              |
| Adenocarcinoma                        | 73           | 8.055±3.858                        |                            |
| Squamous carcinoma                    | 74           | 7.135±3.520                        |                            |

<sup>a</sup>P values were derived using two-sided Pearson  $\chi^2$  tests to compare values for the two parameters in each category.

<sup>b</sup>The tumor stage, lymph node status, and metastasis were classified according to the international system for staging lung cancer<sup>1</sup>.

**Supplementary Table 2. Real-time PCR primer sequences (human)**

| <b>Locus</b> | <b>Forward</b>          | <b>Reverse</b>           |
|--------------|-------------------------|--------------------------|
| NATD:        | ATGTAAGCGAGTGTCTGGACT   | TGGTTTGCATATTCGTTTTGGTC  |
| Slug:        | CTGTGACAAGGAATATGTGAGCC | CAAATGCTCTGTTGCAGTGAG    |
| Twist1:      | GGAGTCCGCAGTCTTACGAG    | TCTGGAGGACCTGGTAGAGG     |
| N-cadherin:  | CCCTGCTTCAGGCGTCTGTA    | TGCTTGCATAATGCGATTTCCACC |
| Vimentin:    | CCACCAGGTCCGTGTCCTCGT   | CGCTGCCCAGGCTGTAGGTG     |
| E-cadherin:  | TTGCACCGGTGCACAAAGGAC   | TGGAGTCCCAGGCGTAGACCAA   |
| Snail:       | GGAAGCCTAACTACAGCGAGCT  | CTGGAAGGTAAACTCTGGATTAG  |
| Zeb1         | GGTCATGATGAAAATGGAACACC | AGGTGTAAGTGCACAGGGAGCA   |
| Zeb2         | GACAGATCAGCACCAAATGC    | GCTGATGTGCGAACTGTAGG     |
| CCND1:       | CAATGACCCCGCACGATTTCC   | CATGGAGGGCGGATTGGAA      |
| CCND2:       | ACCTTCCGCAGTGCTCCTA     | CCCAGCCAAGAAACGGTCC      |
| p21:         | CTGGAGACTCTCAGGGTCGAAA  | GATTAGGGCTTCTCTTGGAG     |
| p27:         | GGAGCAATGCGCAGGAATAA    | TGGGGAACCGTCTGAAACAT     |
| p57:         | GCGTCCCTCCGCAGCACAT     | GGTTCTGGTCTCTCGGCGTTCA   |
| p16:         | CCCCTTGCCTGGAAAGATAC    | AGCCCCTCCTCTTTCTTCCT     |
| p18:         | ACTGGTTTTGCTGTCAATTCA   | GCAGGTTCCCTTCATTATCC     |
| p19:         | ATGCTGCTGGAGGAGGTTCCG   | GTCTTGCCGAAGCGGTTGAG     |
| E2F1:        | AGCTGGACCACCTGATGAAT    | GAGGGGCTTTGATCACCATA     |
| CHEK2:       | TCTCGGGAGTCGGATGTTGAG   | CCTGAGTGGACACTGTCTCTAA   |
| KRAS:        | AGTGCCTTGACGATACAGC     | ACAAAGAAAGCCCTCCC        |
| PCNA:        | ACACTAAGGGCCGAAGATAACG  | ACAGCATCTCCAATATGGCTGA   |
| c-Myc        | CAGCTGCTTAGACGCTGGATTT  | ACCGAGTCGTAGTCGAGGTCAT   |
| PTEN         | TTTGAAGACCATAACCCACCAC  | ATTACACCAGTTCGTCCCTTTC   |
| GAPDH        | GAAGGTGAAGGTCGGAG       | GAAGATGGTGATGGGATTTCC    |

**Supplementary Table 3. Real-time PCR primer sequences (mouse)**

| <b>Locus</b> | <b>Forward</b>          | <b>Reverse</b>         |
|--------------|-------------------------|------------------------|
| NatD         | GGGGAGAAAGTCGAGCAAAG    | CCCATTGCGGTCATACTTCTTG |
| E-cadherin   | CAGTTCCGAGGTCTACACCTT   | TGAATCGGGAGTCTTCCGAAAA |
| N-cadherin   | ATAGCCCGGTTTCACTTGAGA   | CAGGCTTTGATCCCTCTGGA   |
| Slug         | CAGCGAACTGGACACACACA    | ATAGGGCTGTATGCTCCCGAG  |
| Vimentin     | TCCACACGCACCTACAGTCT    | CCGAGGACCGGGTCACATA    |
| Zeb1         | ACTGCAAGAAACGGTTTTCCC   | GGCGAGGAACACTGAGATGT   |
| Zeb2         | ATTGCACATCAGACTTTGAGGAA | ATAATGGCCGTGTGCGTTCCG  |
| Twist1       | TGCAGGACGTGTCCAGCTC     | CTGCTGCGTCTCTTGCGAG    |
| Snail        | CACACGCTGCCTTGTGTCT     | GGTCAGCAAAGCACGGTT     |
| GAPDH        | AGGTCGGTGTGAACGGATTTG   | GGGGTCGTTGATGGCAACA    |

**Supplementary Table 4. ChIP primer sequences**

| <b>Locus</b> | <b>Forward</b>          | <b>Reverse</b>          |
|--------------|-------------------------|-------------------------|
| Slug:        | CTGAACCTCTCAGCTGTGATTGG | CTTTACGAACTGAGCCCGTTTTT |
| Snail        | AAAAAGGCCGTGGCATTTCOA   | GGGACACCTGACCTTCCGAC    |
| Zeb1         | AAGTCACTTCCCATCCCGGTT   | CCAAGGAAAGGGATCGCGG     |
| Zeb2         | TGTAGTGAGGTCTCCCGAG     | TGCATGGGAGCTGCATCTTA    |
| Twist1       | CTCCAAGGGGTTTCGTCTACC   | ACAGCTTCTACACAGTGGGTG   |

**Supplementary Reference:**

1. Mountain, C. F. The international system for staging lung cancer. *Semin. Surg. Oncol.* **18**:106-15 (2000).
